# Supplementary material for: Reduced alternative splicing of estrogen receptor alpha in the endometrium of women with endometriosis
Source: PubMed Central journal article supplement (PMC5746374; doi:10.18632/oncotarget.22701), 2017-11-27
Supplement: oncotarget-08-110176-s001.pdf [file oncotarget-08-110176-s001.pdf]

## Reduced alternative splicing of estrogen receptor alpha in the endometrium of women with endometriosis

### SUPPLEMENTARY MATERIALS

**Supplementary Table 1: Primers for RT-PCR**

| Gene name           | DNA Sequence          |
|---------------------|-----------------------|
| ERa-1-480BP-Forward | ATGCGCTGCGTCGCCTCTAA  |
| ERa-1-480BP-Reverse | CTGCAGGAAAGGCGACAGCT  |
| ERa-2-483BP-Forward | AACGCGCAGGTCTACGGTCA  |
| ERa-2-483BP-Reverse | AATGGTGCACCTGGTTGGTGG |
| ERa-3-487BP-Forward | ACGCCAGGGTGGCAGAGAAA  |
| ERa-3-487BP-Reverse | CAAGGCACTGACCATCTGGT  |
| ERa-4-546BP-Forward | GAGACATGAGAGCTGCCAAC  |
| ERa-4-546BP-Reverse | GGGTGCTGGACAGAAATGTG  |
| ERa-5-484BP-Forward | GGAGAGGAGTTTGTGTGCCT  |
| ERa-5-484BP-Reverse | TGTGGGAGCCAGGGAGCTCT  |
| ERa-6-732BP-Forward | CCCAGGCCAAATTCAGATAA  |
| ERa-6-732BP-Reverse | CTGGAGTGTACACATTTCTGT |

**Supplementary Table 2: Primers for realtime-PCR**

| Name               | Sequence                  |
|--------------------|---------------------------|
| ERa-Del.2-Forward  | CACTCAACAGCGTGTCTC        |
| ERa-Del.2-Reverse  | GTCGTTATGTCCTGTAGAATG     |
| ERa-Del.4-Forward  | TATGTGTCCAGCCACCAA        |
| ERa-Del4-Reverse   | ACAAAGCCACCTTTCATCA       |
| ERa-Del3,4-Forward | CCAAGGAGACTCGCTACT        |
| ERa-Del3,4-Reverse | CTAGAAGGTGGACCTGATC       |
| ERa-Del7-Forward   | GATGAATCTGCAGGGAGAGGAGT   |
| ERa-Del7-Reverse   | GCTCCATGCCTTTGTTACAGAATTA |
